# Supplementary material for: Altered seasonal sensitivity of net ecosystem exchange to controls driven by nutrient balances in a semi-arid savanna
Source: Copernicus journal article supplement (doi:10.5194/bg-22-2935-2025), 2025-06-25
Supplement: Supplementary file 1 [file bg-22-2935-2025-supplement.pdf]

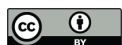

*Supplement of*

**Altered seasonal sensitivity of net ecosystem exchange to controls driven by nutrient balances in a semi-arid savanna**

**Laura Nadolski et al.**

*Correspondence to:* Laura Nadolski (lnadolski@bgc-jena.mpg.de)

The copyright of individual parts of the supplement might differ from the article licence.

### **Text S1: Preliminary analysis with half-hourly data – daily, multiday and seasonal signal**

For a preliminary analysis we used half-hourly measured values (gap-filled values were removed) of day- and nighttime NEE and environmental variables to extract the daily, multiday and seasonal signal of the timeseries. We gap-filled the timeseries with the `igapfill` function from the `rssa`-package (Golyandina and Korobeynikov, 2014). The recommended window length is  $L = N/2.5$  (Mahecha et al., 2007), but it requires extensive computational resources. It was not possible to conduct this with a reasonable amount of memory on the institute-internal high-performance slurm cluster. Gap-filling the complete time series of almost 10 years took more than six days. Therefore, we artificially diminished the window length to  $L=4000$ . We did this for gap-filling the complete NEE timeseries. To find a good trade-off between required computational resources and quality of gap-filling we conducted a sensitivity analysis with a three-year time series with R. After the sensitivity analysis, the window length  $L=10000$  was chosen as a reasonable length for a good trade-off for a 3-year time period.

To find out how the total length  $n$  of the time series affects the gap-filling result, we then compared the respective part of the gap-filled 10-year time series with the 3-year gap-filled timeseries from the sensitivity analysis with the same window length ( $L=4000$ ). We mostly found marginal differences ( $< 0.00$ ), except for 3 months in the beginning and the end of the 3-year comparison period. To reduce these edge effects, we finally chose to artificially prolong the time slices for the analysis by 3 months and then cut out the actual 3-year time period out of those gap-filled values.

We start the analysis at 01.01.2016 in respect to the data availability of all variables at all three towers, to provide the same time series length for all. For the first time slice (01.1.2016-31.12.2018) the time period of October, November and December 2017 were put in front of the beginning as artificial prolongation and in the end of the slice a natural prolongation of the months 01.01.2019 – 31.03.2019 from the original time series. For the second time slice the four-year period of 01.01.2019-31.12.2022 was chosen. The gap-filling was conducted in the same way. Margins were added to reduce edge effects. The margins are 1.10.2018 00:00 - 31.12.2018 23:30 and 01.01.2023 00:00 - 31.03.2023 23:30 and are cut off after the gap-filling procedure.

For the SSA we adapted the window length according to the signal we want to retrieve (Biriukova et al., 2021). Golyandina and Zhigaljavsky (2013) recommend it to be an “integer multiple of  $P$ , i.e.  $L = nxP$ ”. The grouping was done according to the following bins: 2h-1.3 days for the daily signal, multiday 2.7 -21.3 days for the multiday signal and 15 – 366 days for the seasonal signal. We chose window lengths of 2 times the upper bin threshold of the respective frequency bin from the signal we want to retract: 2 years (35136 half-hourly timesteps) for the seasonal signal, 6 weeks (2016 timesteps) for the multiday signal, 2.6 days (125 timesteps). We then subtracted the reconstructed signal from the gap-filled timeseries before continuing with the next timescale iteratively.

The results show that the contribution of the multiday signal in explaining overall variability is marginal for most variables (Fig. S1).

By identifying the drivers of NEE on the daily scale with  $MI_{sync}$  and  $MI_{max}$  we found that as hypothesized the radiation components SWDR and PAR were the most important in explaining NEE variations (Fig. S2). We further see no substantial differences between the treatments.

## Text S2: Gapfilling of daily datasets with Singular Spectrum Analysis

The gap-filling of the daily-resolution dataset was conducted in R as described above. The margins added to the daily dataset are: 10.2017 - 12.2017 and 01.2023-03.2023. They were cut off after the gap-filling procedure that was executed on the slurm cluster. For the GCC measures the margins are: 10.2015 - 12.2015 and 01.2023-03.2023; for NDVI the margins are 10.2015 - 12.2015 and 01.2021 - 03.202. As a window length of  $L = N/2.5$  is recommended (Mahecha et al., 2007), we used for the 7-years daily data (2557 datapoints) a window length of 1000.

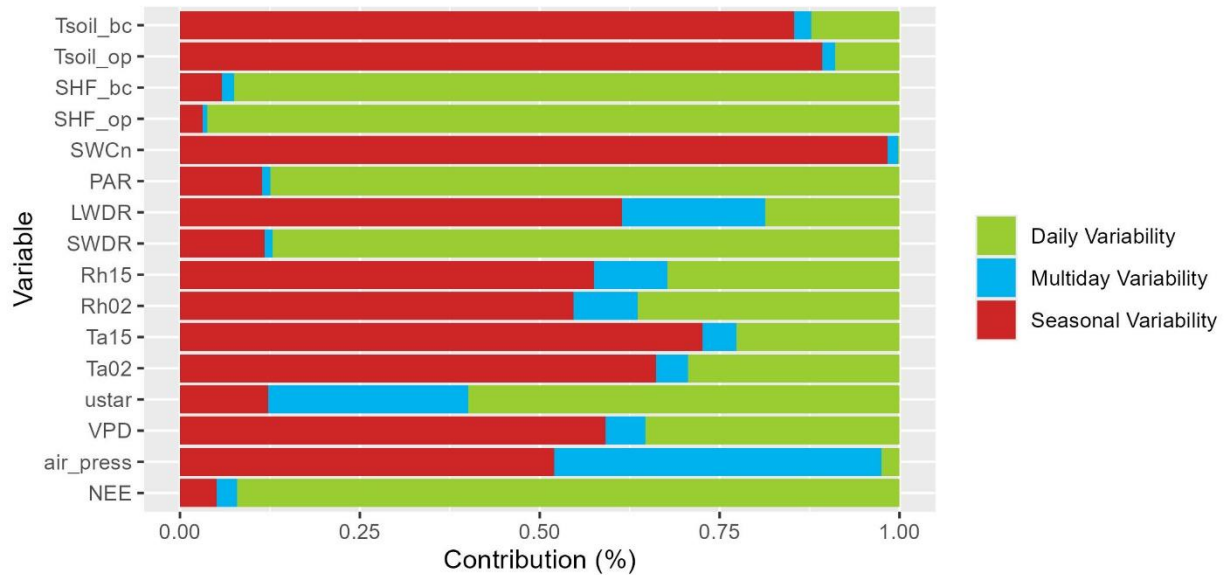

**Figure S1: Relative (%) contribution of daily, multiday and seasonal variability to overall explained variability at the control plot (CT).**

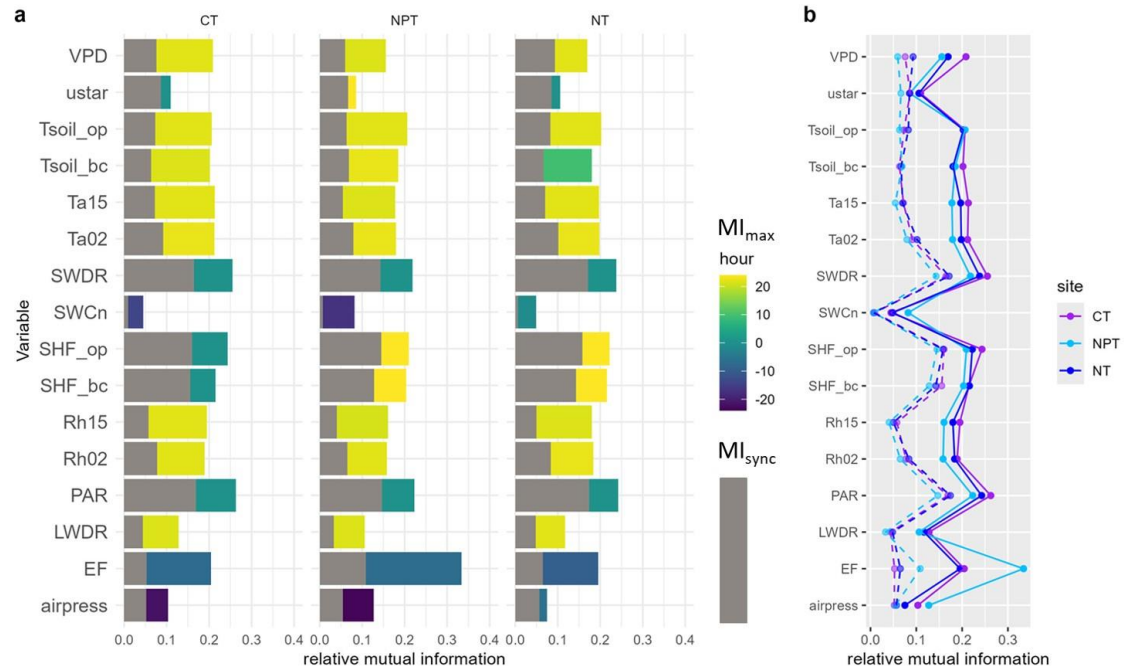

**Figure S2: a.** synchronous ( $MI_{sync}$ , grey) and maximum mutual information ( $MI_{max}$ , colours) at the control site (CT), the nitrogen fertilized site (NT) and the nitrogen and phosphorus fertilized site (NPT) at the daily scale. The colour scale indicates the day when  $MI_{max}$  occurs; with positive values indicating that the variable leads net ecosystem exchange (NEE) and vice versa. **b:**  $MI_{sync}$  (dotted lines) and  $MI_{max}$  (solid lines) values at the three sites.

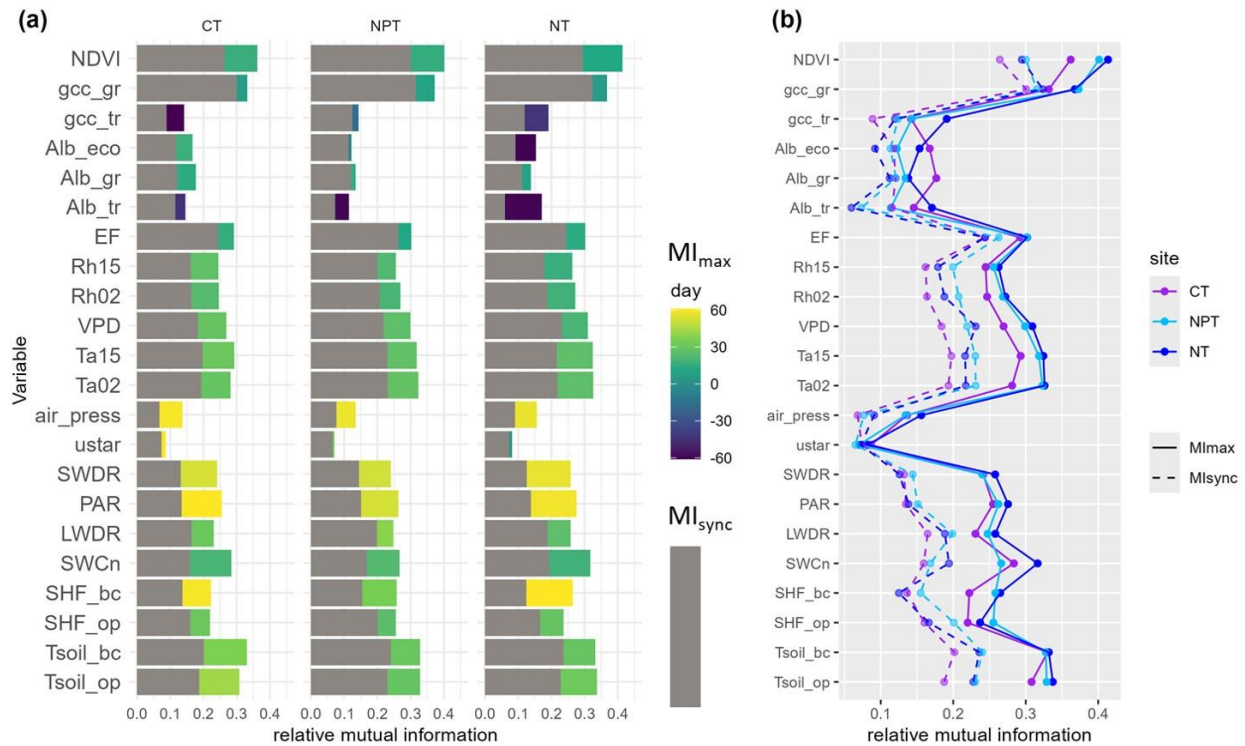

**Figure S3: a.** synchronous ( $MI_{sync}$ , grey) and maximum mutual information ( $MI_{max}$ , colours) at the control site (CT), the nitrogen fertilized site (NT) and the nitrogen and phosphorus fertilized site (NPT) at the seasonal scale. The colour scale indicates the day when  $MI_{max}$  occurs; with positive values indicating that the variable leads net ecosystem exchange (NEE) and vice versa. **b:**  $MI_{sync}$  (dotted lines) and  $MI_{max}$  (solid lines) values at the three sites.

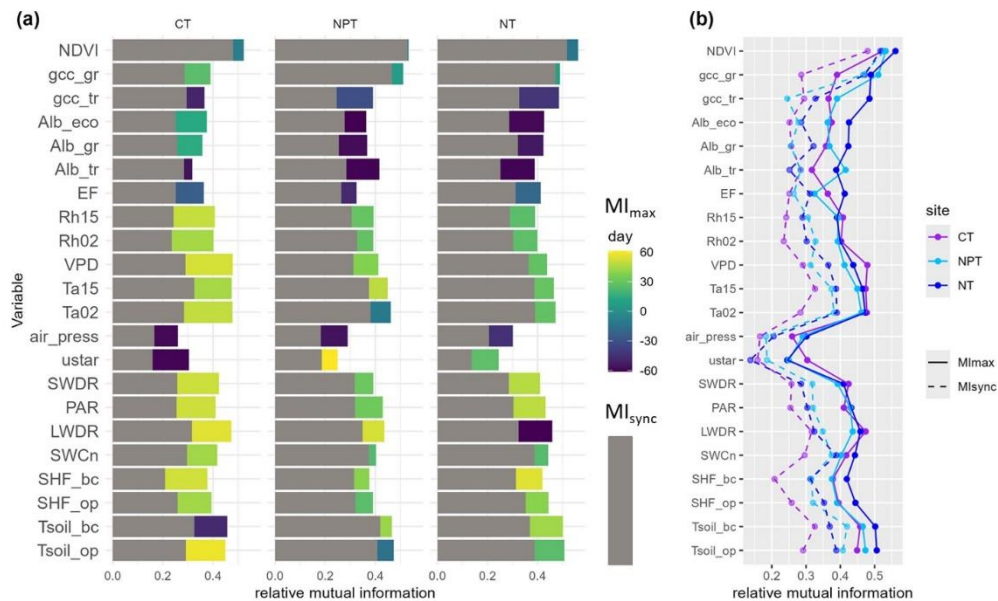

**Figure S4: a.** synchronous ( $MI_{sync}$ , grey) and maximum mutual information ( $MI_{max}$ , colours) at the control site (CT), the nitrogen fertilized site (NT) and the nitrogen and phosphorus fertilized site (NPT) at the seasonal scale one year after fertilization (April 2016-March 2017). The colour scale indicates the day when  $MI_{max}$  occurs; with positive values indicating

that the variable leads net ecosystem exchange (NEE) and vice versa. b.  $MI_{sync}$  (dotted lines) and  $MI_{max}$  (solid lines) values at the three sites.

a)

| variable  | $MI_{sync}$ | $MI_{max}$ | day |
|-----------|-------------|------------|-----|
| Alb_eco   | 0.11772876  | 0.16750376 | 17  |
| Alb_gr    | 0.12047719  | 0.17661187 | 14  |
| Alb_tr    | 0.11564405  | 0.14554554 | -44 |
| EF        | 0.24374901  | 0.2921867  | 15  |
| gcc_gr    | 0.30061542  | 0.33181592 | 7   |
| gcc_tr    | 0.08867581  | 0.14172762 | -61 |
| air_press | 0.06816683  | 0.13623154 | 60  |
| LWDR      | 0.16465547  | 0.23070741 | 31  |
| PAR       | 0.13451337  | 0.25499359 | 61  |
| Rh02      | 0.16379168  | 0.24675816 | 24  |
| Rh15      | 0.16168878  | 0.24468166 | 27  |
| SHF_bc    | 0.13647615  | 0.22220978 | 60  |
| SHF_op    | 0.16026412  | 0.21992901 | 31  |
| SWCn      | 0.15943073  | 0.28359844 | 20  |
| SWDR      | 0.13222293  | 0.24139464 | 53  |
| Ta02      | 0.19334531  | 0.28116365 | 29  |
| Ta15      | 0.19748104  | 0.29296028 | 31  |
| Tsoil_bc  | 0.2016078   | 0.3302836  | 37  |
| Tsoil_op  | 0.18743947  | 0.30804474 | 43  |
| ustar     | 0.07405485  | 0.08627703 | 61  |
| VPD       | 0.18392214  | 0.26942703 | 29  |
| NDVI      | 0.26423444  | 0.36199501 | 16  |

b)

| variable  | $MI_{sync}$ | $MI_{max}$ | day |
|-----------|-------------|------------|-----|
| Alb_eco   | 0.09209015  | 0.15353787 | -61 |
| Alb_gr    | 0.1123587   | 0.13791383 | 10  |
| Alb_tr    | 0.05960352  | 0.17065947 | -60 |
| EF        | 0.24383065  | 0.30190766 | 14  |
| gcc_gr    | 0.32366194  | 0.36760555 | 6   |
| gcc_tr    | 0.11963968  | 0.19104968 | -43 |
| air_press | 0.09081075  | 0.15579189 | 57  |
| LWDR      | 0.1885456   | 0.25803826 | 26  |
| PAR       | 0.1381655   | 0.27559199 | 59  |
| Rh02      | 0.18781088  | 0.27192317 | 18  |
| Rh15      | 0.17884909  | 0.26253308 | 16  |
| SHF_bc    | 0.1249318   | 0.26481665 | 61  |
| SHF_op    | 0.16631364  | 0.23705208 | 29  |
| SWCn      | 0.19410951  | 0.31649583 | 18  |
| SWDR      | 0.12598611  | 0.25783745 | 57  |
| Ta02      | 0.21741211  | 0.32593695 | 26  |
| Ta15      | 0.21643334  | 0.32434894 | 26  |
| Tsoil_bc  | 0.23596201  | 0.3318591  | 29  |

|          |            |            |    |
|----------|------------|------------|----|
| Tsoil_op | 0.22762391 | 0.33736884 | 32 |
| ustar    | 0.07268535 | 0.08159846 | 5  |
| VPD      | 0.23096581 | 0.30914403 | 20 |
| NDVI     | 0.29455806 | 0.41356506 | 12 |

c)

| variable  | MI <sub>sync</sub> | MI <sub>max</sub> | day |
|-----------|--------------------|-------------------|-----|
| Alb_eco   | 0.11342472         | 0.12228515        | -6  |
| Alb_gr    | 0.12082653         | 0.13412669        | 15  |
| Alb_tr    | 0.07328528         | 0.11396369        | -60 |
| EF        | 0.26262279         | 0.30143873        | 12  |
| gcc_gr    | 0.31523177         | 0.3729792         | 10  |
| gcc_tr    | 0.12375608         | 0.14285954        | -16 |
| air_press | 0.07673951         | 0.13422675        | 58  |
| LWDR      | 0.19890105         | 0.24743235        | 39  |
| PAR       | 0.15088525         | 0.26245326        | 53  |
| Rh02      | 0.2076121          | 0.26856807        | 20  |
| Rh15      | 0.19947535         | 0.25546004        | 22  |
| SHF_bc    | 0.15501874         | 0.25824679        | 35  |
| SHF_op    | 0.2008617          | 0.25528881        | 25  |
| SWCn      | 0.16857209         | 0.26624298        | 23  |
| SWDR      | 0.14403219         | 0.24009299        | 52  |
| Ta02      | 0.23105497         | 0.32297797        | 28  |
| Ta15      | 0.2304047          | 0.31819103        | 27  |
| Tsoil_bc  | 0.24014            | 0.32774306        | 30  |
| Tsoil_op  | 0.23028433         | 0.32882794        | 29  |
| ustar     | 0.06493692         | 0.06991779        | 31  |
| VPD       | 0.21920735         | 0.29911951        | 26  |
| NDVI      | 0.30036176         | 0.4012426         | 15  |

**Table S1: Synchronous (MI<sub>sync</sub>, grey) and maximum mutual information (MI<sub>max</sub>, colours) values and leading/lagging days at the control site (CT, a), the nitrogen fertilized site (NT, b) and the nitrogen and phosphorus fertilized site (NPT, c) at the seasonal scale.**
